# Supplementary material for: Roma Ethnicity and Sex-Specific Associations of Serum Uric Acid with Cardiometabolic and Hepatorenal Health Factors in Eastern Slovakian Population: The HepaMeta Study
Source: PubMed Central journal article supplement (PMC7589897; doi:10.3390/ijerph17207673), 2020-10-21
Supplement: ijerph-17-07673-s001.pdf [file ijerph-17-07673-s001.pdf]

**Table 1.** Relationship between uric acid adjusted for age, sex and BMI and dependent variables in all study participants.

| <b>Dependent variable</b>       | <b>B (linreg) x10<br/>unstandardized</b> | <b>Std. Error of B</b> | <b>Beta Stand.</b> | <b>p</b> |
|---------------------------------|------------------------------------------|------------------------|--------------------|----------|
| Systolic blood pressure (mmHg)  | 0.021                                    | 0.017                  | 0.041              | 0.217    |
| Diastolic blood pressure (mmHg) | 0.045                                    | 0.026                  | 0.059              | 0.08     |
| Albumin (mg/L)                  | 0.312                                    | 0.091                  | 0.107              | 0.001    |
| Cystatin C (mg/L)               | 3.156                                    | 1.564                  | 0.062              | 0.044    |
| Creatinine (umol/L)             | 0.206                                    | 0.028                  | 0.277              | <0.0001  |
| AST (ukat/L)                    | 2.412                                    | 0.821                  | 0.089              | 0.003    |
| ALT (ukat/L)                    | 1.265                                    | 0.917                  | 0.042              | 0.168    |
| GMT (ukat/L)                    | 0.907                                    | 0.347                  | 0.08               | 0.009    |
| Fe (mmol/L)                     | 0.143                                    | 0.037                  | 0.118              | <0.0001  |
| Feritin (mg/L)                  | 0.004                                    | 0.001                  | 0.116              | 0.001    |
| hsCRP (mg/L)                    | 0.174                                    | 0.078                  | 0.074              | 0.026    |
| Poverty                         | -1.060                                   | 0.545                  | -0.059             | 0.052    |
| Alcohol daily >20g              | 2.62                                     | 0.867                  | 0.092              | 0.003    |
| Smokers                         | -1.853                                   | 0.503                  | -0.11              | <0.0001  |

BMI—body mass index; AST—aspartate-aminotransferase; ALT—alanine-aminotransferase; GMT—gamma-glutamyl transferase; Fe—serum iron level; hsCRP—high sensitivity C-reactive protein.
